# Supplementary material for: Controlling the pandemic during the SARS-CoV-2 vaccination rollout
Source: PubMed Central journal article supplement (PMC8209021; doi:10.1038/s41467-021-23938-8), 2021-06-16
Supplement: 41467_2021_23938_MOESM1_ESM.pdf [file 41467_2021_23938_MOESM1_ESM.pdf]

## Supplementary Information

### Controlling the pandemic during the SARS-CoV-2 vaccination rollout

João Viana, MSc<sup>1,2</sup>, Christiaan H. van Dorp, PhD<sup>3</sup>, Ana Nunes, PhD<sup>2,4</sup>, Manuel C. Gomes, PhD<sup>2</sup>, Michiel van Boven, PhD<sup>1</sup>, Mirjam E. Kretzschmar, PhD<sup>1</sup>, Marc Veldhoen, PhD<sup>5</sup>, and Ganna Rozhnova, PhD<sup>\*1,4</sup>

<sup>1</sup>Julius Center for Health Sciences and Primary Care, University Medical Center Utrecht, Utrecht University, Utrecht, The Netherlands

<sup>2</sup>Faculdade de Ciências, Universidade de Lisboa, Lisbon, Portugal

<sup>3</sup>Theoretical Biology and Biophysics (T-6), Los Alamos National Laboratory, Los Alamos, New Mexico, USA

<sup>4</sup>BioISI—Biosystems & Integrative Sciences Institute, Faculdade de Ciências, Universidade de Lisboa, Lisbon, Portugal

<sup>5</sup>Instituto de Medicina Molecular João Lobo Antunes, Faculdade de Medicina, Universidade de Lisboa, Lisbon, Portugal

May 20, 2021

---

\*Corresponding author:

Dr. Ganna Rozhnova  
Julius Center for Health Sciences and Primary Care  
University Medical Center Utrecht  
P.O. Box 85500 Utrecht  
The Netherlands  
Email: g.rozhnova@umcutrecht.nl  
Phone: +31 631117965

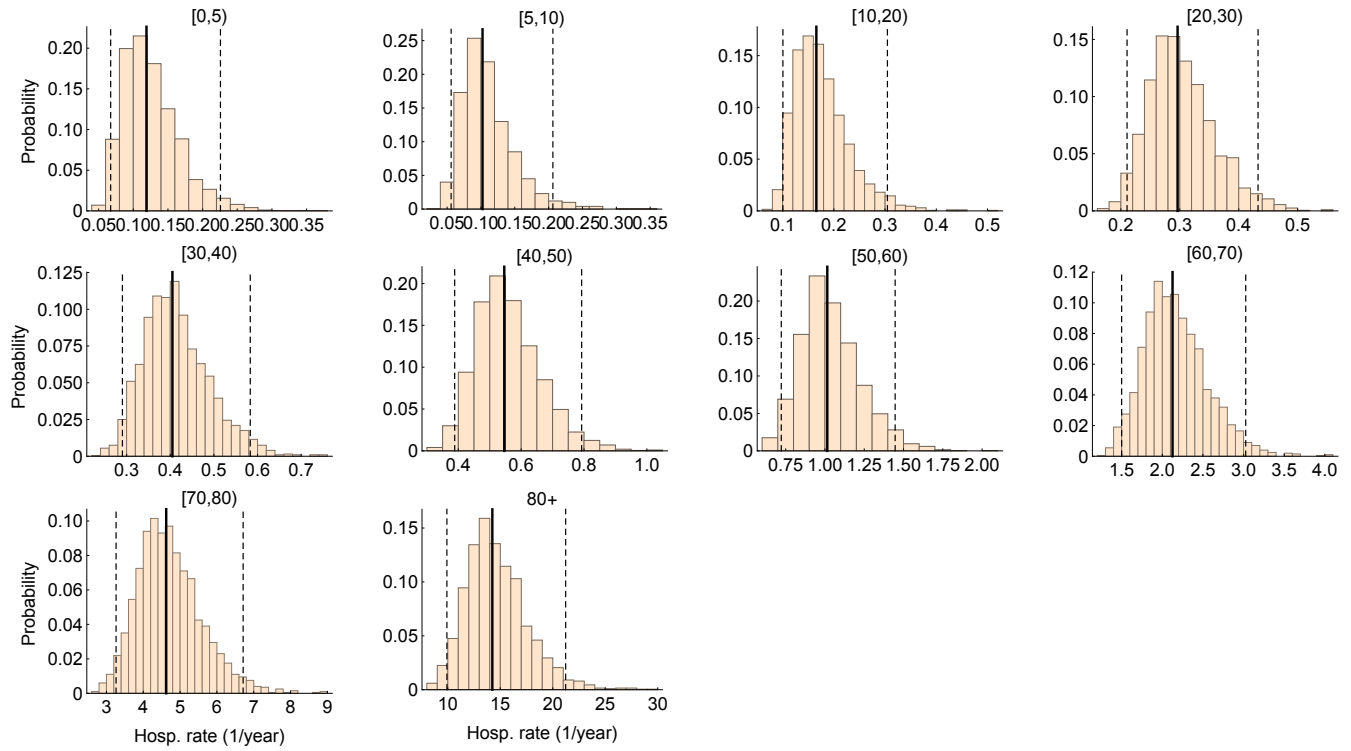

**Supplementary Figure 1. Estimated hospitalization rates.** The histograms of age-specific hospitalization rates estimated by the model in the Bayesian framework. Supplementary Table 4 indicates prior distributions of these parameters. The solid and the dashed lines are, respectively, the medians and the 95% credible intervals based on 2,000 parameter samples from the posterior distribution.

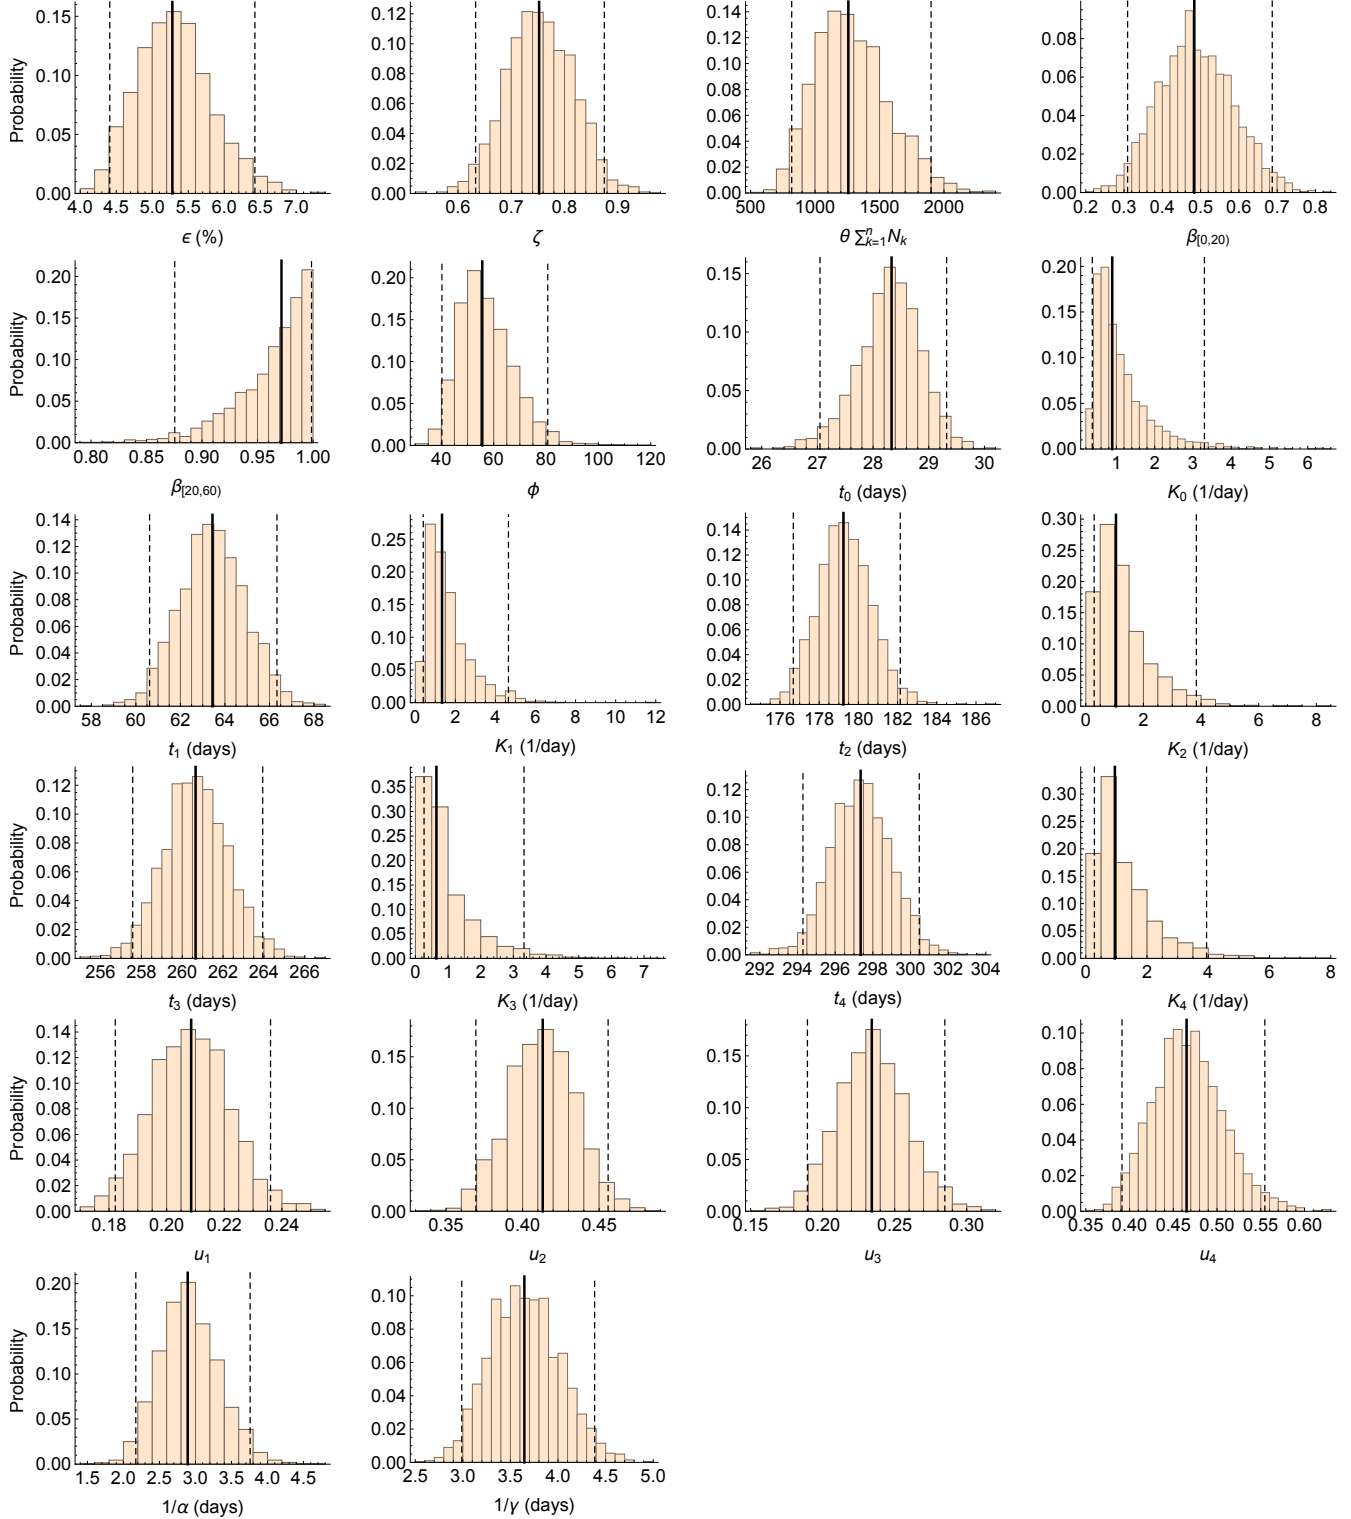

**Supplementary Figure 2. Estimated model parameters.** The histograms of parameters estimated by the model in the Bayesian framework. Supplementary Table 4 indicates prior distributions of these parameters. The solid and the dashed lines are, respectively, the medians and the 95% credible intervals based on 2,000 parameter samples from the posterior distribution. The time  $t = 0$  corresponds to 26 February 2020. The susceptibility of 60+ age group was used as the reference, i.e.  $\beta_{60+} \equiv 1$ . The description of the parameters is given in Supplementary Table 1.

**Supplementary Table 1. Summary of the model parameters.**

| Description (unit)                                                                | Notation                                                           | Reference                                                        |
|-----------------------------------------------------------------------------------|--------------------------------------------------------------------|------------------------------------------------------------------|
| <b>Constant parameters</b>                                                        |                                                                    |                                                                  |
| Latent period (days)                                                              | $1/\alpha$                                                         | Estimated                                                        |
| Infectious period (days)                                                          | $1/\gamma$                                                         | Estimated                                                        |
| Over-dispersion parameter for the NegBinom distribution for hospitalizations      | $\phi$                                                             | Estimated                                                        |
| Initial fraction of infected persons                                              | $\theta$                                                           | Estimated                                                        |
| Probability of transmission per contact                                           | $\epsilon[1 + 0.5/(1 + e^{-K_0(t-t_{\text{data}})})]$ <sup>b</sup> | $\epsilon$ and $K_0$ estimated, $t_{\text{data}}$ is 15 Jan 2021 |
| <b>Age-specific parameters<sup>a</sup></b>                                        |                                                                    |                                                                  |
| Force of infection for unvaccinated and vaccinated persons (1/day)                | $\lambda_k(t), \lambda_k^V(t)$                                     | Eqs. (3) and (4)                                                 |
| Contact rate for unvaccinated persons (1/day)                                     | $c_{kl}(t)$                                                        | Estimated, see Suppl. Table 5                                    |
| Contact rate for vaccinated persons (1/day)                                       | $c_{kl}^V(t)$                                                      | Assumed                                                          |
| Hospitalization rate (1/day)                                                      | $\nu_k$                                                            | Estimated                                                        |
| Susceptibility of age group $k$ relative to age group 60+, $\beta_{60+} \equiv 1$ | $\beta_k$                                                          | Estimated                                                        |
| Population size of age group $k$                                                  | $N_k$                                                              | [1]                                                              |
| <b>Vaccination parameters<sup>a</sup></b>                                         |                                                                    |                                                                  |
| Vaccination rate (1/day)                                                          | $r_k$                                                              | Calculated from Table 1 and Figure 4 a                           |
| Vaccine efficacy in reducing susceptibility                                       | $VE_S$                                                             | [2–9]                                                            |
| Vaccine efficacy in reducing infectivity                                          | $VE_I$                                                             | [2–9]                                                            |
| Vaccine efficacy in reducing hospitalization rate                                 | $VE_H$                                                             | [2–9]                                                            |
| <b>Vaccine efficacies sets</b>                                                    |                                                                    |                                                                  |
| Optimistic set (Figures 6, 7, Suppl. Figures 5, 6, 10)                            |                                                                    | 94%, 0%, 67%                                                     |
| Pessimistic set (Suppl. Figures 7, 8, Suppl. Table 2)                             |                                                                    | 55%, 0%, 0%                                                      |
|                                                                                   | $(VE_S, VE_I, VE_H)$                                               | 94%, 0%, 67%                                                     |
|                                                                                   |                                                                    | 94%, 50%, 67%                                                    |
| Sensitivity to $VE_I$ (Suppl. Figure 11, Suppl. Table 6)                          |                                                                    | 94%, 100%, 100%                                                  |
|                                                                                   |                                                                    | 55%, 0%, 0%                                                      |
|                                                                                   |                                                                    | 55%, 50%, 0%                                                     |
|                                                                                   |                                                                    | 55%, 100%, 100%                                                  |

Notes: <sup>a</sup>Indices  $k$  and  $l$  denote the age groups  $k, l = 1, \dots, n$ , where  $n = 10$  is the number of age groups. <sup>b</sup>The rapid spread of B.1.1.7 variant, that is estimated to be about 50% more transmissible based on the data from England [10–12], fueled the third wave of hospitalizations in Portugal. The increasing dominance of this variant was modelled empirically as a gradual increase in the probably of transmission per contact by 50% as follows  $\epsilon[1 + 0.5/(1 + e^{-K_0(t-t_{\text{data}})})]$ , where  $\epsilon$  and  $K_0$  were estimated based on the data until 15 January 2021 (Supplementary Figure 2) and  $t_{\text{data}}$  is the last date in the hospital admission data (15 January 2021).

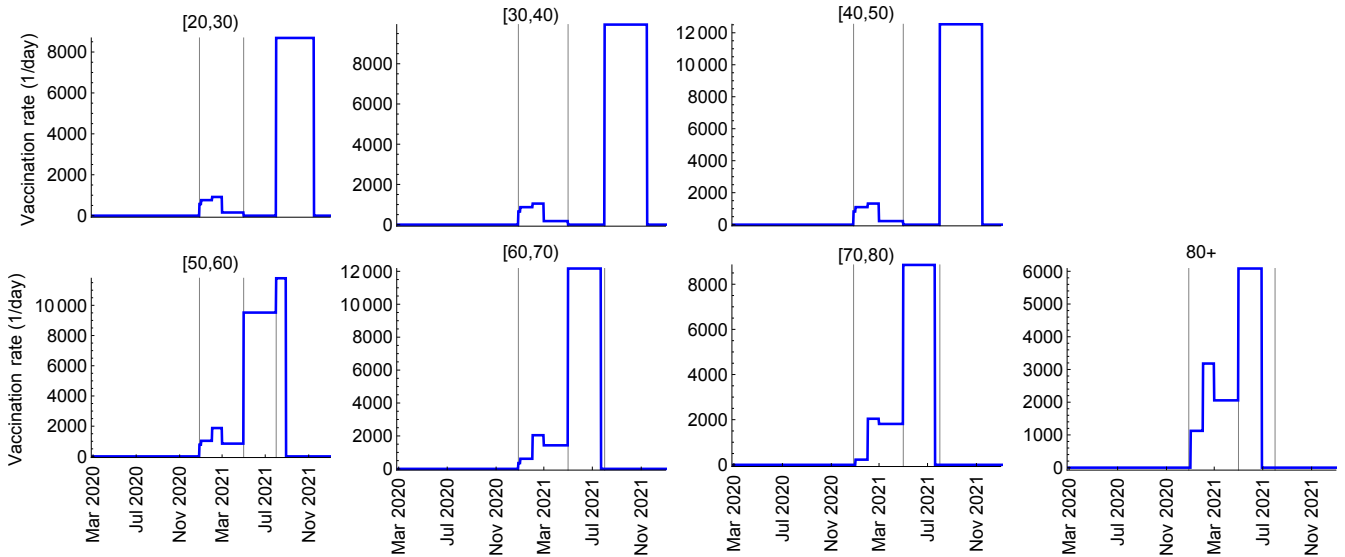

**Supplementary Figure 3. Age-specific vaccination rates.** Vaccination rate (number of persons vaccinated per day) per age group calculated using the national vaccination plan (Table 1) and age distribution of various vaccination categories (Figure 4 a). The vertical lines indicate the starting dates of different phases of vaccination (Table 1). According to the current guidelines persons under 18 years old are not eligible for vaccination. In the model, we assumed that the age group of 0 to 20 years old is not vaccinated.

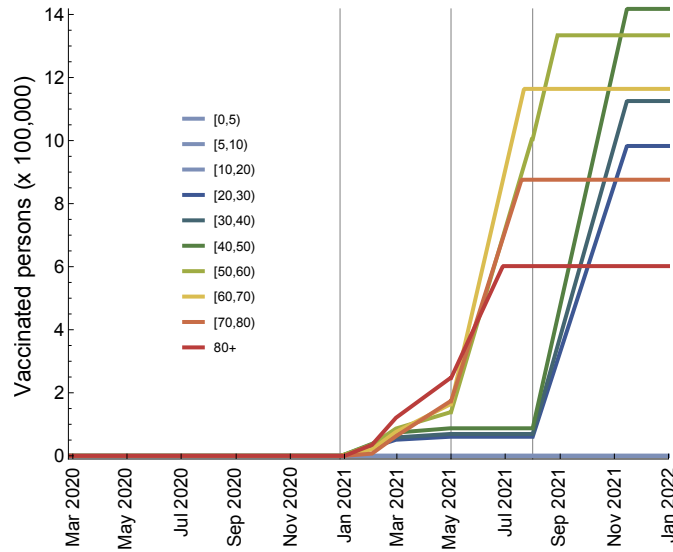

**Supplementary Figure 4. Number of vaccinated persons per age group during the vaccination rollout.** These numbers were calculated using the national vaccination plan (Table 1) and age distribution of various vaccination categories (Figure 4 a). The vertical lines indicate the starting dates for vaccination of different phases of vaccination (Table 1). According to the current guidelines persons under 18 years old are not eligible for vaccination. In the model, we assumed that the age group of 0 to 20 years old is not vaccinated.

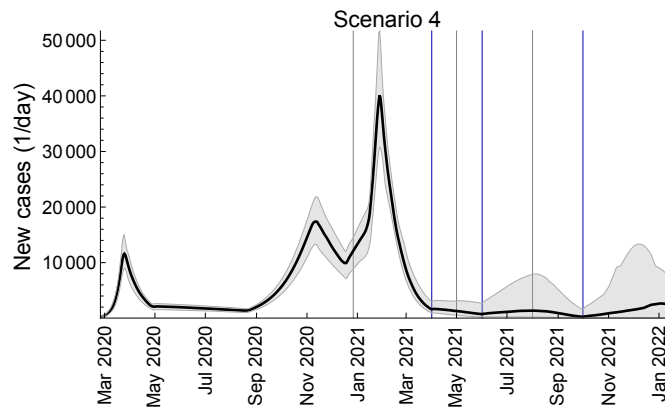

**Supplementary Figure 5. Infectious cases dynamics for Figure 7.** New daily cases of SARS-CoV-2 for Scenario 4 presented in Figure 7 in the main text. The black line is the median trajectory estimated from the model. The gray shaded region corresponds to 95% credible intervals. The blue vertical lines indicate the mid-points of relaxation steps (1 April, 1 June, 1 October). The gray vertical lines indicate the starting dates for different vaccination phases (Table 1).

**Supplementary Table 2. Cumulative median hospitalizations and cases from 1 April 2021 till 24 June 2022.**

| Scenario 4*                                                                               | Hospitalizations | Cases in vaccinated | Cases in unvaccinated |
|-------------------------------------------------------------------------------------------|------------------|---------------------|-----------------------|
| 1. Optimistic vaccine efficacies                                                          | 4,088            | 40,892              | 708,353               |
| 2. Optimistic vaccine efficacies & pre-pandemic contacts rates for vaccinated population  | 4,301            | 44,883              | 724,926               |
| 3. Pessimistic vaccine efficacies                                                         | 30,028           | 1,200,810           | 1,390,640             |
| 4. Pessimistic vaccine efficacies & pre-pandemic contacts rates for vaccinated population | 31,344           | 1,085,410           | 1,497,820             |

Notes: \*The plots are shown in Supplementary Figures 7 and 8.

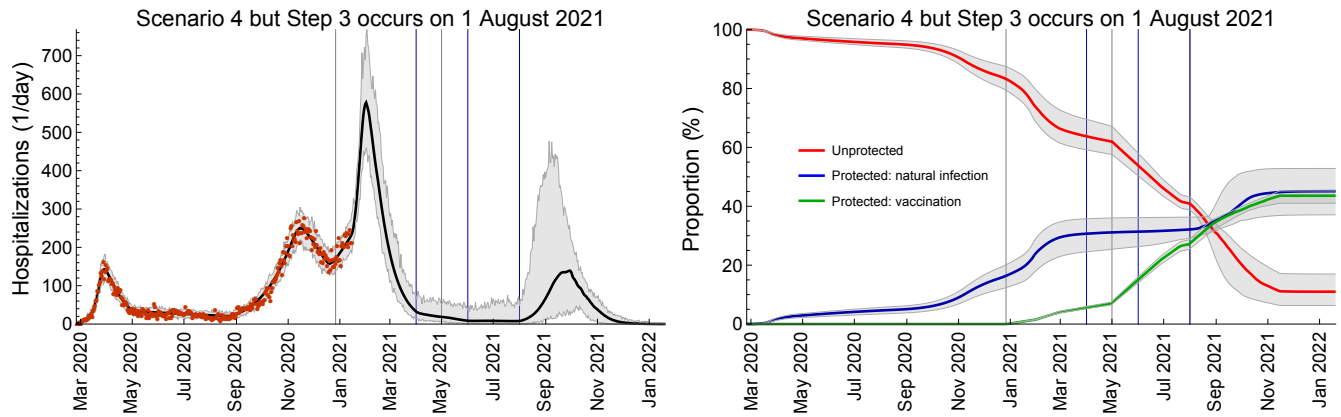

**Supplementary Figure 6. Impact of timings of different relaxation steps.** Total daily hospital admissions with COVID-19 and proportion of protected population for Scenario 4 (Figure 7 in the main text) with Step 3 occurring on 1 August instead of 1 October 2021. The hospitalization data are shown as red dots. The solid lines are the median trajectories estimated from the model. The gray shaded regions correspond to 95% credible intervals. The blue vertical lines indicate the mid-points of relaxation steps (1 April, 1 June, 1 August). The gray vertical lines indicate the starting dates for different vaccination phases (Table 1).

**Supplementary Table 3. ICPC-2 codes for morbidities specified in the Portuguese vaccination plan.**

| Morbidities            | ICPC-2 code                                                                                 |
|------------------------|---------------------------------------------------------------------------------------------|
| Cardiac insufficiency  | K75, K77                                                                                    |
| Coronary heart disease | K74, K76                                                                                    |
| Renal insufficiency    | U99 and GFR < 60 ml/min                                                                     |
| COPD                   | R95 or another chronic respiratory disease requiring ventilation                            |
| Diabetes               | T89, T90                                                                                    |
| Neoplasm               | A79, B72-74, D74-76, F74, H75, K72, L71, N74, R84-85, S77, T71, T73, U75-77, X75-77, Y77-78 |
| Hepatic insufficiency  | D97                                                                                         |
| Obesity                | T82                                                                                         |
| High blood pressure    | K86, K87                                                                                    |

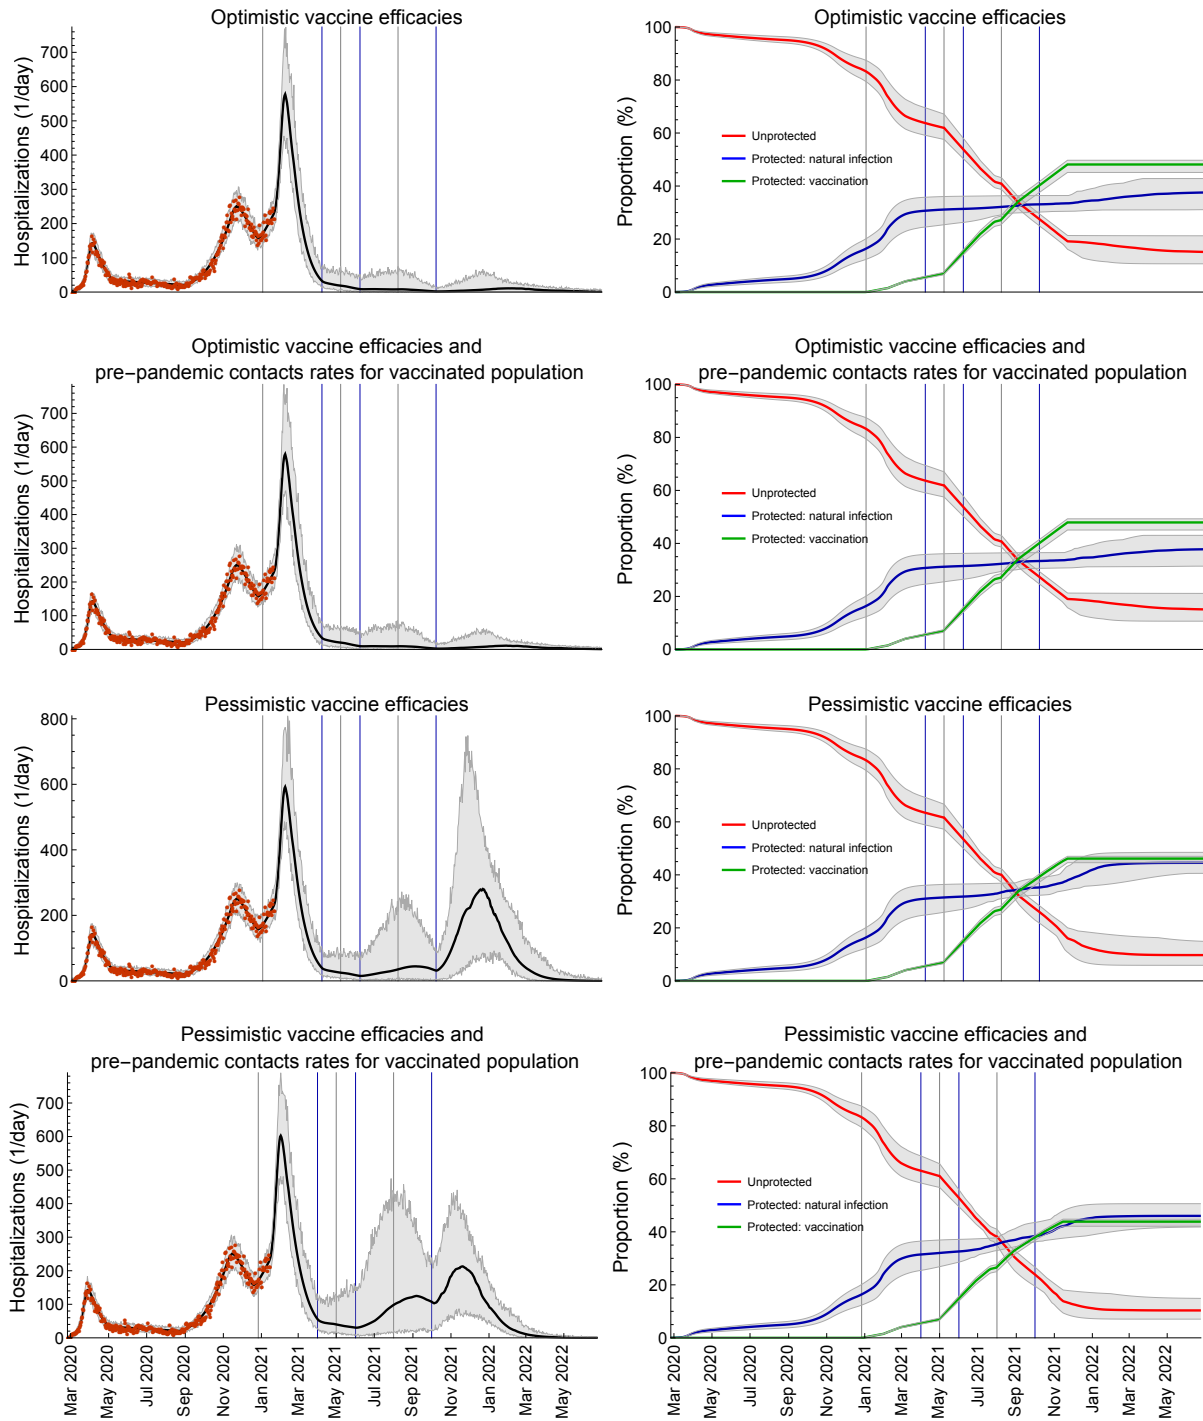

**Supplementary Figure 7. Impact of vaccine efficacies and contact rates of vaccinated individuals.** Scenario 4 but with an optimistic and a pessimistic set of vaccine efficacies (Supplementary Table 1). In addition to using two sets of vaccine efficacies, we allow for behavior compensation post-vaccination modelled as a return to pre-pandemic contact rates among vaccinated persons as compared to unvaccinated persons who may continue to have reduced contact rates due to control measures. For easier comparison of all scenarios, the top row panels (optimistic vaccine efficacies) are the same as Figures 7 a and d in the main text but plotted for a longer period of time (until 24 June 2022). The infectious cases dynamics is shown in Supplementary Figure 8 and the cumulative median number of hospitalizations is summarized in Supplementary Table 2. The hospitalization data are shown as red dots. The solid lines are the median trajectories estimated from the model. The gray shaded regions correspond to 95% credible intervals. The blue vertical lines indicate the mid-points of relaxation steps (1 April, 1 June, 1 October 2021). The gray vertical lines indicate the starting dates for different vaccination phases (Table 1).

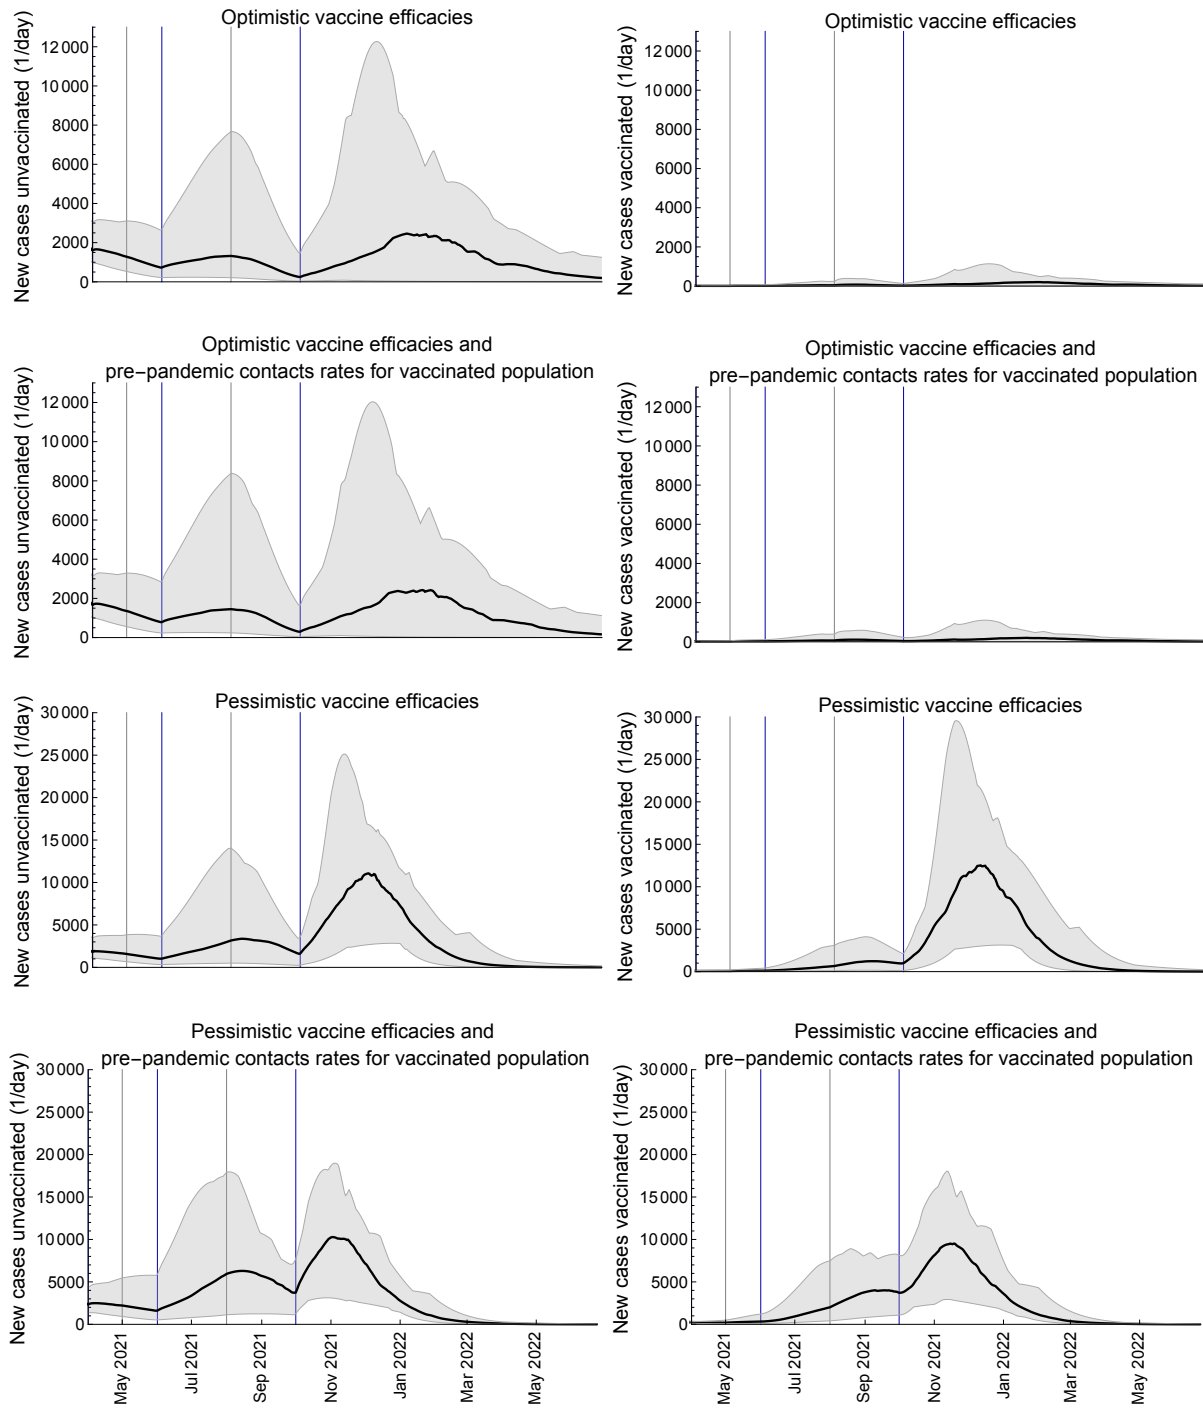

**Supplementary Figure 8. Infectious cases dynamics for Supplementary Figure 7.** New daily cases of SARS-CoV-2 in vaccinated and unvaccinated populations for scenarios presented in Supplementary Figure 7. These scenarios correspond to an optimistic and a pessimistic set of vaccine efficacies (Supplementary Table 1) and the possibility of behavior compensation post-vaccination modelled as a return to pre-pandemic contact rates among vaccinated persons as compared to unvaccinated persons who may continue to have reduced contact rates due to control measures. The cumulative median number of cases is summarized in Supplementary Table 2. The black line is the median trajectory estimated from the model. The gray shaded region corresponds to 95% credible intervals. The blue vertical lines indicate the mid-points of relaxation steps (1 April - coincides with the x-axis, 1 June, 1 October). The gray vertical lines indicate the starting dates for different vaccination phases (Table 1).



**Supplementary Table 4. Prior distribution of the statistical model.**

| Parameter         | Prior                                    | Description                                                                                                                 |
|-------------------|------------------------------------------|-----------------------------------------------------------------------------------------------------------------------------|
| $\epsilon$        | Uniform(0, 1)                            | Flat prior                                                                                                                  |
| $\theta$          | Uniform( $10^{-7}$ , $5 \cdot 10^{-4}$ ) | Vague prior allowing for 1 to 5000 infected individuals on day $t = 0$                                                      |
| $\phi$            | Lognormal(5, 2)                          | Vague prior <sup>a</sup>                                                                                                    |
| $\alpha$          | InvGamma(32.25, 9.75)                    | 99% of the prior density of $\alpha^{-1}$ is between 2 and 5 days; chosen to be shorter than the incubation period [13, 14] |
| $\gamma$          | InvGamma(80, 20)                         | 99% of the prior density of $\gamma^{-1}$ is between 2.9 and 5.2 days; chosen to match the observed serial interval [15]    |
| $\nu_k$           | folded- $\mathcal{N}(0, 5)$              | Vague prior, where $k$ denotes [0, 5), [5, 10), [10, 20), [20, 30), [30, 40), [40, 50), [50, 60), [60, 70), [70, 80), 80+   |
| $\beta_{(0,20)}$  | LogNormal(log(0.23), 0.5)                | Odds-ratio <sup>b</sup> 2.23 based on prior estimates [16]                                                                  |
| $\beta_{[20,60)}$ | LogNormal(log(0.64), 0.5)                | Odds-ratio <sup>b</sup> 0.64 based on prior estimates [16]                                                                  |
| $\zeta$           | $\mathcal{N}(1, 0.1)$                    | <i>A priori</i> , $\zeta$ should be close to 1                                                                              |
| $u_i$             | Uniform(0, 1)                            | Flat prior ( $i = 1, \dots, 4$ )                                                                                            |
| $K_i$             | Exp(1)                                   | With $K_i = 1$ , the uptake of control measures takes approximately 6 days ( $i = 0, \dots, 4$ )                            |
| $t_0$             | $\mathcal{N}(22, 7)$                     | First lockdown around 18 March 2020 (State of Emergency)                                                                    |
| $t_1 - 2.94/K_1$  | $\mathcal{N}(69, 7)$                     | Start of relaxation of lockdown around 4 May 2020 2020 <sup>c</sup>                                                         |
| $t_2$             | $\mathcal{N}(203, 7)$                    | Further relaxation on 15 September 2020 (school opening)                                                                    |
| $t_3$             | $\mathcal{N}(254, 7)$                    | Second lockdown 05 November 2020 (State of Emergency)                                                                       |
| $t_4$             | $\mathcal{N}(304, 7)$                    | Relaxation of second lockdown on 25 December 2020                                                                           |

Notes: <sup>a</sup>The scale parameters of the normal distributions are equal to the standard deviation. <sup>b</sup>The age class 60+ is taken as a reference for the relative susceptibility, i.e.,  $\beta_{60+} \equiv 1$ . <sup>c</sup>The prior on the time of relaxation of the first lockdown is put on the time where the logistic function equals 5%. Notice that  $\text{logit}(0.05) = -2.94$ .

**Supplementary Table 5. Parameters describing contact structure.**

| Description (unit)                                                                | Notation*                             | Reference                                                                |
|-----------------------------------------------------------------------------------|---------------------------------------|--------------------------------------------------------------------------|
| <b>Contact rates (1/day)</b>                                                      |                                       |                                                                          |
| Baseline (pre-pandemic)                                                           | $b_{kl}$                              | [17]                                                                     |
| After the first lockdown                                                          | $\zeta a_{kl}$                        | $\zeta$ estimated, $a_{kl}$ inferred using [18]                          |
| After the first relaxation                                                        | $u_1 b_{kl} + (1 - u_1) \zeta a_{kl}$ | Estimated                                                                |
| After the second relaxation due to school opening                                 | $u_2 b_{kl} + (1 - u_2) \zeta a_{kl}$ | Estimated                                                                |
| After the second lockdown                                                         | $u_3 b_{kl} + (1 - u_3) \zeta a_{kl}$ | Estimated                                                                |
| After the relaxation due to winter holidays                                       | $u_4 b_{kl} + (1 - u_4) \zeta a_{kl}$ | Estimated                                                                |
| After the third lockdown                                                          | $\zeta a_{kl}$                        | Assumed                                                                  |
| After first relaxation during the vaccination rollout (Scenario 1)                | $b_{kl}$                              | Assumed                                                                  |
| After first relaxation during the vaccination rollout (Scenario 2)                | $u_2 b_{kl} + (1 - u_2) \zeta a_{kl}$ | Assumed                                                                  |
| After first relaxation during the vaccination rollout (Scenario 3)                | $u_1 b_{kl} + (1 - u_1) \zeta a_{kl}$ | Assumed                                                                  |
| After first, second, third relaxation during the vaccination rollout (Scenario 4) | Matrices for Scenario 3, 2, 1         | Assumed                                                                  |
| <b>Mid-point time of the logistic function (days)</b>                             |                                       |                                                                          |
| Introduction of the first lockdown                                                | $t_0$                                 | Estimated                                                                |
| Relaxation after the first lockdown                                               | $t_1$                                 | Estimated                                                                |
| Second relaxation due to school opening                                           | $t_2$                                 | Estimated                                                                |
| Introduction of the second lockdown                                               | $t_3$                                 | Estimated                                                                |
| Relaxation due to winter holidays                                                 | $t_4$                                 | Estimated                                                                |
| Introduction of the third lockdown                                                | $t_5$                                 | 28 January 2021, Assumed                                                 |
| First relaxation during the vaccination rollout                                   | $t_6$                                 | 1 April 2021, Assumed                                                    |
| Second relaxation during the vaccination rollout                                  | $t_7$                                 | 1 June 2021, Assumed                                                     |
| Third relaxation during the vaccination rollout                                   | $t_8$                                 | 1 October 2021 (main analyses), 1 August (sensitivity analyses), Assumed |
| <b>Slope of the logistic function (1/day)</b>                                     |                                       |                                                                          |
| Introduction of the first lockdown                                                | $K_0$                                 | Estimated                                                                |
| Relaxation after the first lockdown                                               | $K_1$                                 | Estimated                                                                |
| Second relaxation due to school opening                                           | $K_2$                                 | Estimated                                                                |
| Introduction of the second lockdown                                               | $K_3$                                 | Estimated                                                                |
| Relaxation due to winter holidays                                                 | $K_4$                                 | Estimated                                                                |
| Introduction of the third lockdown                                                | $K_0$                                 | Assumed                                                                  |
| First relaxation during the vaccination rollout                                   | $K_1$                                 | Assumed                                                                  |
| Second relaxation during the vaccination rollout                                  | $K_1$                                 | Assumed                                                                  |
| Third relaxation during the vaccination rollout                                   | $K_1$                                 | Assumed                                                                  |
| <b>Proportion of time a person behaves as before the pandemic</b>                 |                                       |                                                                          |
| Relaxation after the first lockdown                                               | $u_1$                                 | Estimated                                                                |
| Second relaxation due to school opening                                           | $u_2$                                 | Estimated                                                                |
| Introduction of the second lockdown                                               | $u_3$                                 | Estimated                                                                |
| Relaxation due to winter holidays                                                 | $u_4$                                 | Estimated                                                                |

\*Indices  $k$  and  $l$  denote the age groups  $k, l = 1, \dots, n$ , where  $n = 10$  is the number of age groups.

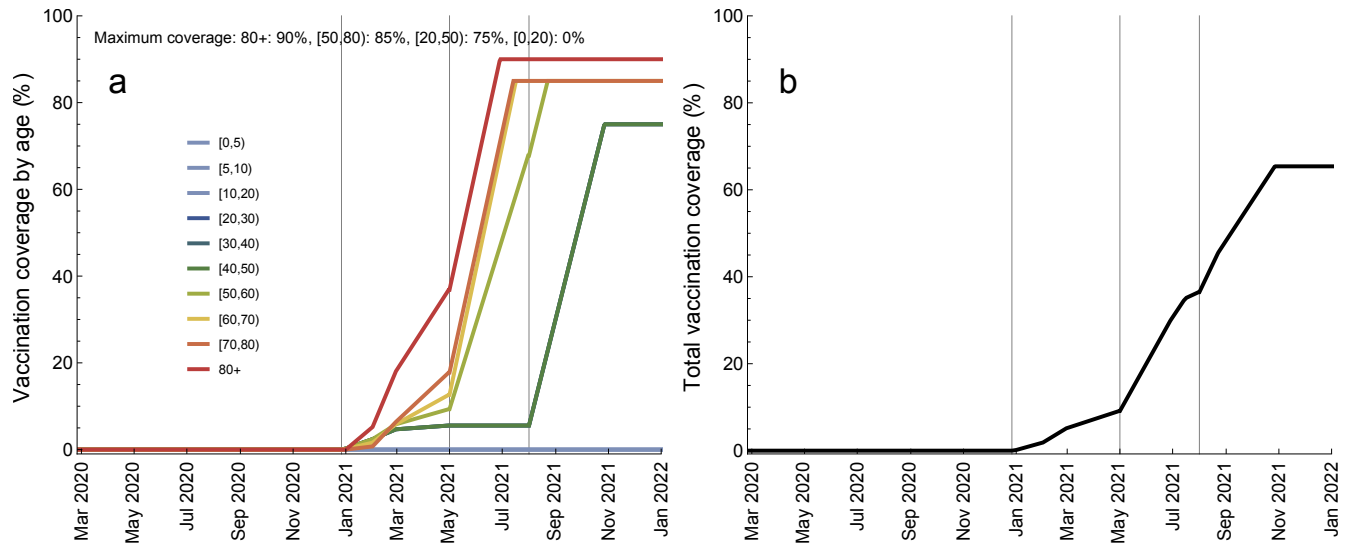

**Supplementary Figure 9. Sensitivity analyses for the maximum vaccination coverage.** **a** Age-specific coverage (percentage of vaccinated persons per age group). **b** Total vaccination coverage (percentage of vaccinated persons in the population). The gray vertical lines indicate the starting dates for different vaccination phases (Table 1). The maximum coverage for age group of [0,20), [20,50), [50,80), and 80+ is 0%, 75%, 85%, and 90%, respectively. The relaxation scenarios are shown in Supplementary Figure 10. For comparison, in the main text the maximum vaccination coverage for age group of [0,20) and 20+ is 0% and 90%, respectively (Figures 5, 6 and 7).

**Supplementary Table 6. Cumulative median hospitalizations and cases from 1 April 2021 till 24 June 2022.**

| Sensitivity analyses to $VE_I^*$                | Hospitalizations | Cases in vaccinated | Cases in unvaccinated |
|-------------------------------------------------|------------------|---------------------|-----------------------|
| $VE_S = 94\%$ , $VE_I = 0\%$ , $VE_H = 67\%$    | 4,088            | 40,892              | 708,353               |
| $VE_S = 94\%$ , $VE_I = 50\%$ , $VE_H = 67\%$   | 3,767            | 36,054              | 663,226               |
| $VE_S = 94\%$ , $VE_I = 100\%$ , $VE_H = 100\%$ | 3,492            | 31,461              | 619,910               |
| $VE_S = 55\%$ , $VE_I = 0\%$ , $VE_H = 0\%$     | 30,028           | 1,200,810           | 1,390,640             |
| $VE_S = 55\%$ , $VE_I = 50\%$ , $VE_H = 0\%$    | 12,815           | 509,925             | 941,670               |
| $VE_S = 55\%$ , $VE_I = 100\%$ , $VE_H = 100\%$ | 6,410            | 215,768             | 620,192               |

Notes: \*The plots are shown in Supplementary Figure 11.

## References

- [1] Contemporary Portugal Database (Pordata); 2020. Available from: <https://www.pordata.pt/>.
- [2] Polack FP, Thomas SJ, Kitchin N, Absalon J, Gurtman A, Lockhart S, et al. Safety and Efficacy of the BNT162b2 mRNA Covid-19 Vaccine. *New England Journal of Medicine*. 2020;383(27):2603-2615. doi:10.1056/NEJMoa2034577.
- [3] Dagan N, Barda N, Kepten E, Miron O, Perchik S, Katz MA, et al. BNT162b2 mRNA Covid-19 Vaccine in a Nationwide Mass Vaccination Setting. *New England Journal of Medicine*. 0;0(0):null. doi:10.1056/NEJMoa2101765.

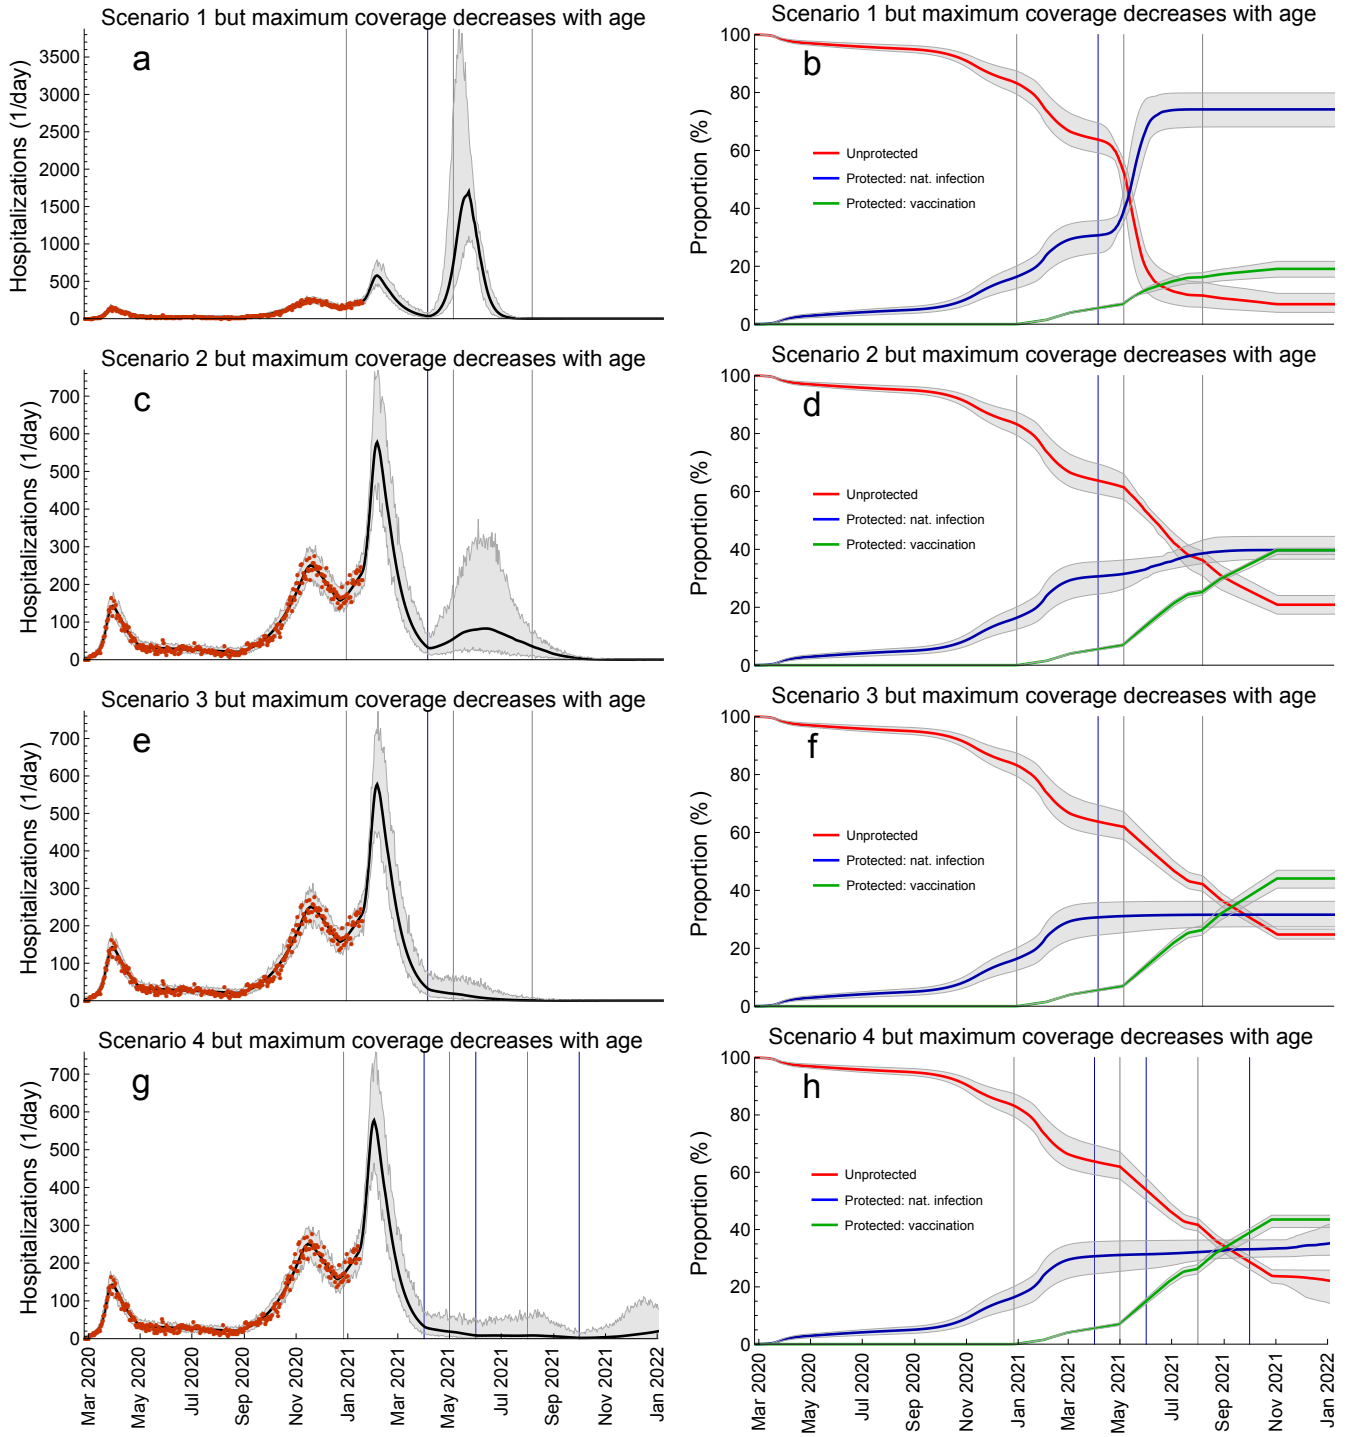

**Supplementary Figure 10. Impact of the maximum vaccination coverage.** Scenarios 1, 2, 3 and 4 (Figures 6 and 7 in the main text) but with the maximum vaccination coverage decreasing with age (see Supplementary Figure 9). The maximum coverage for age group of [0,20), [20,50), [50,80), and 80+ is 0%, 75%, 85%, and 90%, respectively. The hospitalization data are shown as red dots. The solid lines are the median trajectories estimated from the model. The gray shaded regions correspond to 95% credible intervals. The blue vertical lines indicate the mid-points of relaxation steps (1 April, 1 June, 1 October 2021). The gray vertical lines indicate the starting dates for different vaccination phases (Table 1). The cumulative median number of hospitalizations between 1 April 2021 and 1 January 2022 is practically the same for Scenarios 1, 2, 3, and 8% higher for Scenario 4 than in Figures 6 and 7.

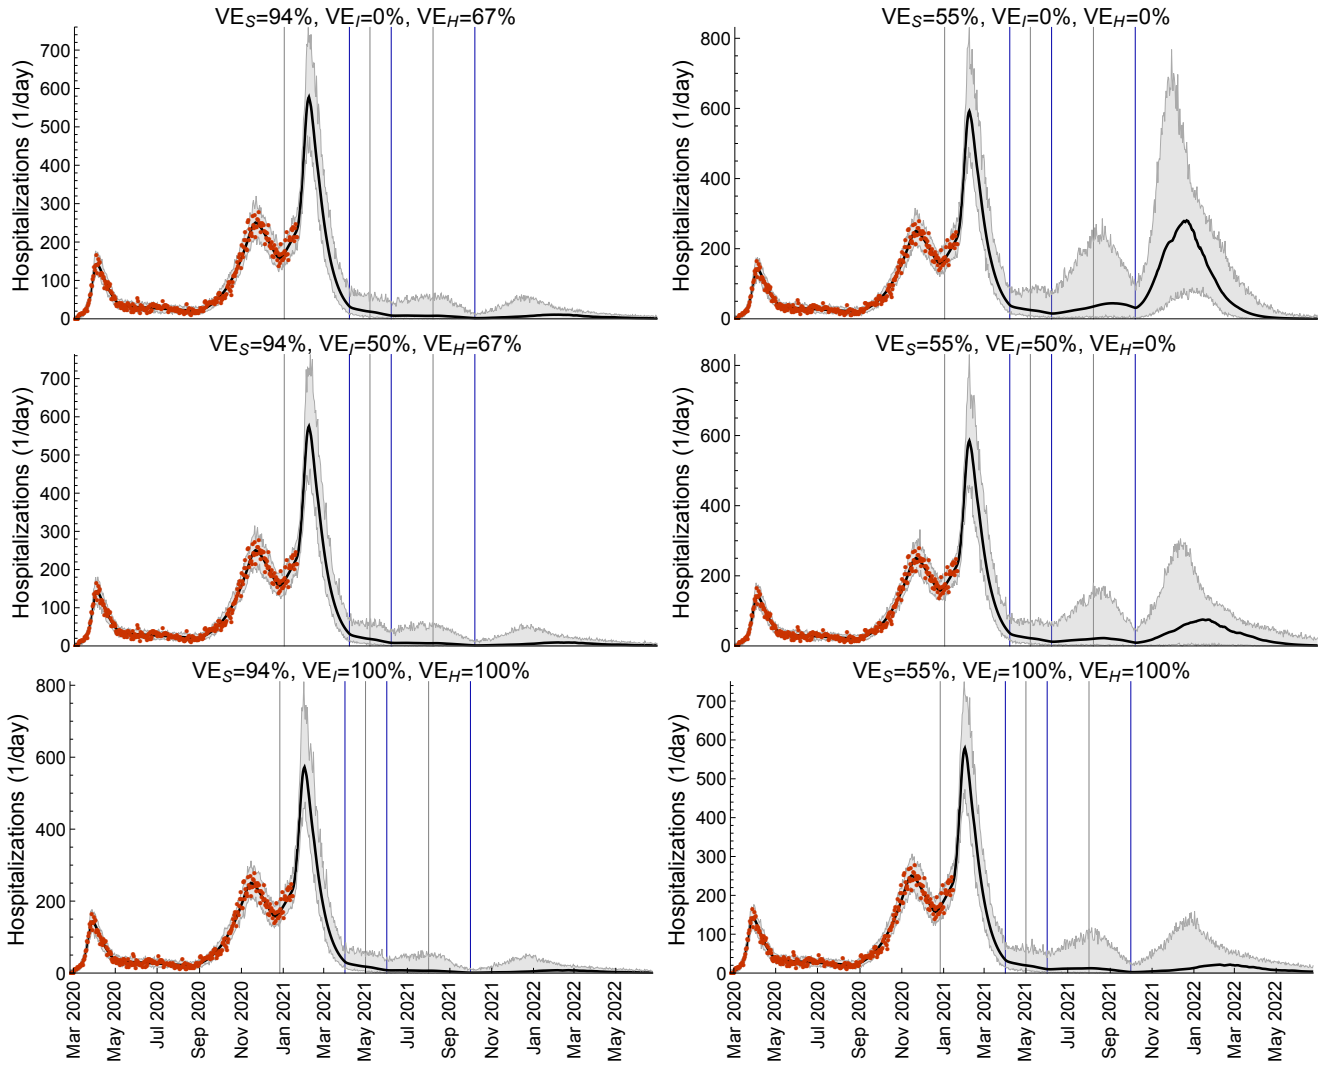

**Supplementary Figure 11. Sensitivity analyses for  $VE_I$ .** We considered Scenario 4 (top row corresponding to optimistic and pessimistic assumptions about vaccine efficacies with  $VE_I = 0\%$ ) and two additional values of  $VE_I$  (Supplementary Table 1):  $VE_I = 50\%$  that corresponds to 50% infectivity of vaccinated persons relative to infectivity of unvaccinated persons and  $VE_I = 100\%$  that is a best-case scenario implying that breakthrough cases in vaccinated individuals are not infectious at all. The hospitalization data are shown as red dots. The solid lines are the median trajectories estimated from the model. The gray shaded regions correspond to 95% credible intervals. The blue vertical lines indicate the mid-points of relaxation steps (1 April, 1 June, 1 October 2021). The gray vertical lines indicate the starting dates for different vaccination phases (Table 1). The cumulative median number of hospitalizations and cases in vaccinated and unvaccinated are summarized in Supplementary Table 6.

- [4] Moustsen-Helms IR, Emborg HD, Nielsen J, Nielsen KF, Krause TG, Mølbak K, et al. Vaccine effectiveness after 1st and 2nd dose of the BNT162b2 mRNA Covid-19 Vaccine in long-term care facility residents and healthcare workers – a Danish cohort study. medRxiv. 2021;doi:10.1101/2021.03.08.21252200.
- [5] Real-World Evidence Confirms High Effectiveness of Pfizer-BioNTech COVID-19 Vaccine and Profound Public Health Impact of Vaccination One Year After Pandemic Declared; 2021. Available from: <https://www.businesswire.com/news/home/20210311005482/en/>.

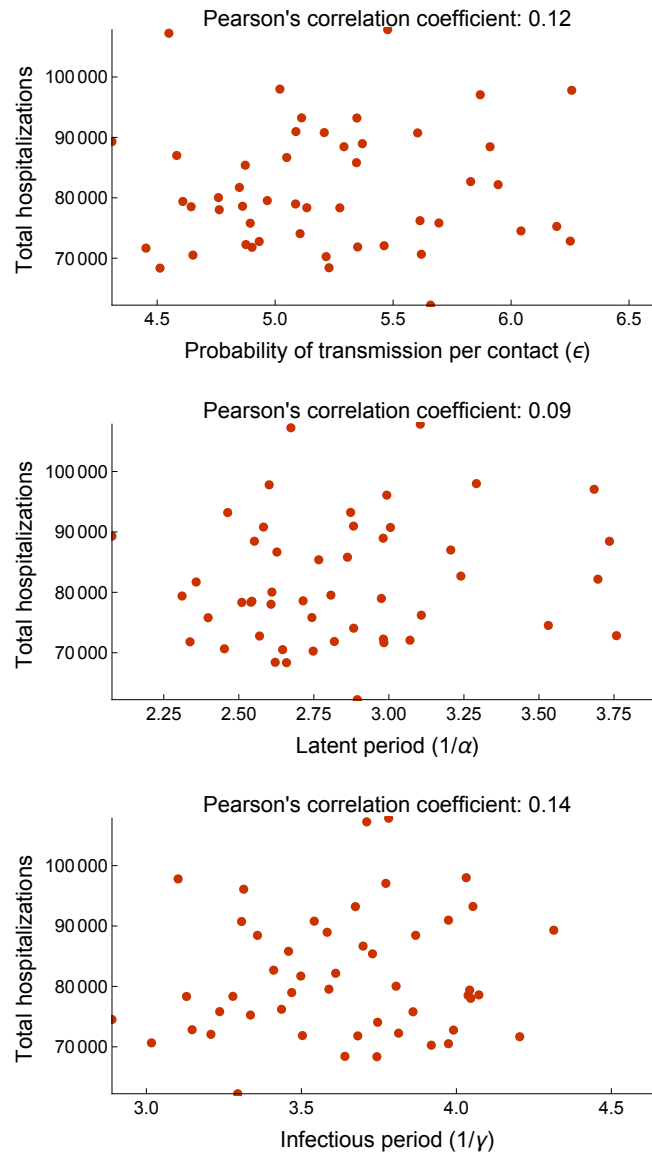

**Supplementary Figure 12. Sensitivity of total hospitalizations to key epidemiological parameters.**

Scatter plots of the cumulative number of hospitalizations from 25 February 2020 till 24 June 2022 and the estimated probability of transmission per contact, the latent period and the infectious period for Scenario 4 and pessimistic assumptions about vaccine efficacies. Pearson correlation coefficients between the three parameters and the cumulative hospitalizations are in the range of 0.09 to 0.14.

- [6] Hall, Victoria Jane and Foulkes, Sarah and Saei, Ayoub and Andrews, Nick and Oguti, Blanche and Charlett, Andre and Wellington, Edgar and Stowe, Julia and Gillson, Natalie and Atti, Ana and Islam, Jasmin and Karagiannis, Ioannis and Munro, Katie and Khawam, Jameel and Group, The SIREN Study and Chand, Meera A and Brown, Colin and Ramsay, Mary E and Bernal, Jamie Lopez and Hopkins, Susan. Effectiveness of BNT162b2 mRNA Vaccine Against Infection and COVID-19 Vaccine Coverage in Healthcare Workers in England, Multicentre Prospective Cohort Study (the SIREN Study); 2021. Available from: <http://dx.doi.org/10.2139/ssrn.3790399>.

- [7] Chodick G, Tene L, Patalon T, Gazit S, Tov AB, Cohen D, et al. The effectiveness of the first dose of BNT162b2 vaccine in reducing SARS-CoV-2 infection 13-24 days after immunization: real-world evidence. medRxiv. 2021;doi:10.1101/2021.01.27.21250612.
- [8] Scientific Advisory Group for Emergencies. Imperial College London: Unlocking roadmap scenarios for England, 18 February 2021; 2021. Available from: <https://www.gov.uk/government/publications/imperial-college-london-unlocking-roadmap-scenarios-for-england-18-february-2021>.
- [9] Lipsitch M, Kahn R. Interpreting vaccine efficacy trial results for infection and transmission. medRxiv. 2021;doi:10.1101/2021.02.25.21252415.
- [10] Davies NG, Abbott S, Barnard RC, Jarvis CI, Kucharski AJ, Munday JD, et al. Estimated transmissibility and impact of SARS-CoV-2 lineage B.1.1.7 in England. Science. 2021;doi:10.1126/science.abg3055.
- [11] Volz E, Mishra S, Chand M, Barrett JC, Johnson R, Geidelberg L, et al. Transmission of SARS-CoV-2 Lineage B.1.1.7 in England: Insights from linking epidemiological and genetic data. medRxiv. 2021;doi:10.1101/2020.12.30.20249034.
- [12] Graham MS, Sudre CH, May A, Antonelli M, Murray B, Varsavsky T, et al. The effect of SARS-CoV-2 variant B.1.1.7 on symptomatology, re-infection and transmissibility. medRxiv. 2021;doi:10.1101/2021.01.28.21250680.
- [13] Lauer SA, Grantz KH, Bi Q, Jones FK, Zheng Q, Meredith HR, et al. The Incubation Period of Coronavirus Disease 2019 (COVID-19) From Publicly Reported Confirmed Cases: Estimation and Application. Annals of Internal Medicine. 2020;172(9):577–582. doi:10.7326/M20-0504.
- [14] Park M, Cook AR, Lim JT, Sun Y, Dickens BL. A Systematic Review of COVID-19 Epidemiology Based on Current Evidence. Journal of Clinical Medicine. 2020;9(4). doi:10.3390/jcm9040967.
- [15] Ali ST, Wang L, Lau EHY, Xu XK, Du Z, Wu Y, et al. Serial interval of SARS-CoV-2 was shortened over time by nonpharmaceutical interventions. Science. 2020;369(6507):1106–1109. doi:10.1126/science.abc9004.
- [16] Jing Q, Liu M, Zhang Z, Fang L, Yuan J, Zhang A, et al. Household secondary attack rate of COVID-19 and associated determinants in Guangzhou, China: a retrospective cohort study. Lancet Infect Dis. 2020;20(10):1141–1150. doi:10.1016/S1473-3099(20)30471-0.
- [17] Mistry D, Litvinova M, Pastore y Piontti A, Chinazzi M, Fumanelli L, Gomes MFC, et al. Inferring high-resolution human mixing patterns for disease modeling. Nature Communications. 2021;12(1):323. doi:10.1038/s41467-020-20544-y.
- [18] Backer JA, Mollema L, Vos ER, Klinkenberg D, van der Klis FR, de Melker HE, et al. Impact of physical distancing measures against COVID-19 on contacts and mixing patterns: repeated cross-sectional surveys, the Nether-

lands, 201617, April 2020 and June 2020. Eurosurveillance. 2021;26(8). doi:<https://doi.org/10.2807/1560-7917.ES.2021.26.8.2000994>.
